# Supplementary material for: Plasmodium falciparum FIKK Kinase Members Target Distinct Components of the Erythrocyte Membrane
Source: PubMed Central journal article supplement (PMC2909202; doi:10.1371/journal.pone.0011747), 2010-07-23
Supplement: pone.0011747.s001.pdf [file pone.0011747.s001.pdf]

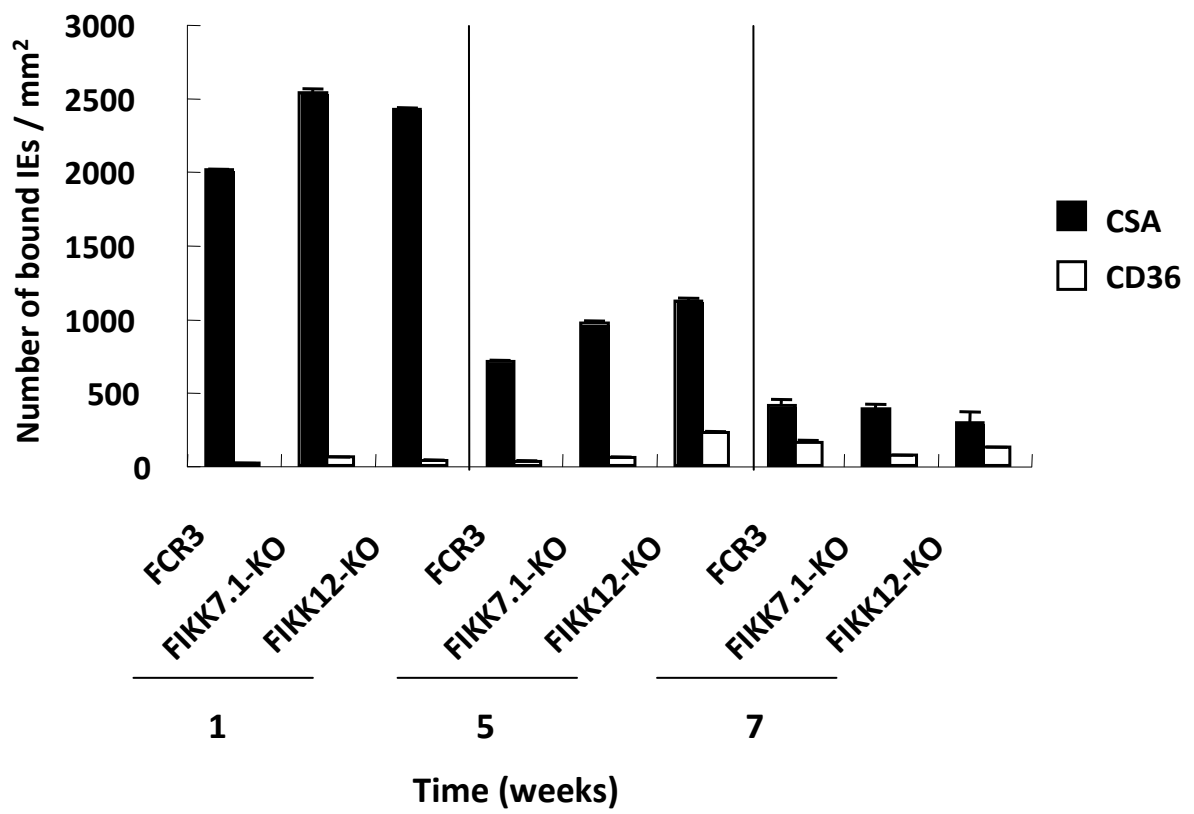

Supplementary-Figure 1
